# Supplementary material
Source: MDPI journal article supplement (https://www.mdpi.com/2073-4395/12/11/2694)
Supplement: s1 [file s1]

## Supplementary Materials

Table S1. Electric field as seed priming method and germination percentages in each secondary stages every day for basil

| Secondary Stages | Days  |       |       |       |      |       |       |       |      |      |       |       |      |
|------------------|-------|-------|-------|-------|------|-------|-------|-------|------|------|-------|-------|------|
|                  | 1     | 2     | 3     | 4     | 5    | 6     | 7     | 8     | 9    | 10   | 11    | 12    | 13   |
| 00               | 13.75 | 10.25 | 10.25 | 10.25 | 8.75 | 8.5   | 7.25  | 7     | 6.5  | 6.5  | 6.5   | 6.5   | 6.5  |
| 01               | 21.5  | 16.75 | 5     | 2.75  |      |       |       |       |      |      |       |       |      |
| 03               | 60.75 | 39.25 | 6     | 3     | 4    | 1.25  | 1     |       | 0.25 |      |       |       |      |
| 05               | 4     | 22.5  | 4.5   | 1.75  | 1.75 | 1     | 0.25  | 0.75  | 0.75 | 0.25 |       |       |      |
| 06a              |       | 8.25  | 5.5   | 3.25  | 1.25 | 0.5   | 0.5   | 0.5   |      | 0.25 |       |       |      |
| 06b              |       | 3     | 11.25 | 5     | 0.5  | 0.75  |       |       |      | 0.5  |       |       |      |
| 06c              |       |       | 26.75 | 5     | 1.5  | 0.25  |       | 0.5   | 0.5  |      |       |       |      |
| 07               |       |       | 27.75 | 26.75 | 6.25 | 1.75  | 1.25  |       | 0.25 | 0.75 |       |       |      |
| 08               |       |       | 1.75  | 32.75 | 29.5 | 10.75 | 4     | 0.5   | 0.25 | 0.25 |       |       |      |
| 09a              |       |       | 1.25  | 9.5   | 41   | 40.25 | 17.25 | 12.25 | 10   | 5.5  | 0.25  | 0.25  |      |
| 09b              |       |       |       |       | 5.5  | 35    | 68.5  | 78.5  | 81.5 | 86   | 93.25 | 93.25 | 93.5 |

Note: values below 1% were excluded the regular development pattern; blue <5%, green 5–50%, red >50%

Table S2. Magnetic field as seed priming method and germination percentages in each secondary stages every day for basil

| Secondary Stages | Days |       |       |       |       |       |      |       |       |       |       |      |      |
|------------------|------|-------|-------|-------|-------|-------|------|-------|-------|-------|-------|------|------|
|                  | 1    | 2     | 3     | 4     | 5     | 6     | 7    | 8     | 9     | 10    | 11    | 12   | 13   |
| 00               | 13.5 | 11.5  | 9.5   | 9.5   | 9.5   | 8.25  | 8    | 8     | 8     | 7     | 7.75  | 7.75 | 7.75 |
| 01               | 37   | 16.5  | 0.75  | 0.75  |       |       |      |       |       |       |       |      |      |
| 03               | 49.5 | 26.75 | 7.75  | 1.75  |       |       |      |       |       |       |       |      |      |
| 05               |      | 21    | 3.5   | 1     | 0.75  | 1     | 0.75 | 0.5   |       | 1     |       |      |      |
| 06a              |      | 11.75 | 4     | 1.25  | 0.5   |       |      |       |       | 0.25  |       |      |      |
| 06b              |      | 12.5  | 12    | 2.25  | 1     | 0.25  |      |       |       |       |       |      |      |
| 06c              |      |       | 21.75 | 13.25 | 1     | 0.25  | 0.5  | 0.25  | 0.5   | 0.5   | 0.25  |      |      |
| 07               |      |       | 31.5  | 19    | 1     | 0.5   |      |       |       |       | 0.5   |      |      |
| 08               |      |       | 8.5   | 35.25 | 33.75 | 13.25 | 2.75 | 0.5   | 0.5   | 0.75  | 0.5   | 1    | 0.5  |
| 09a              |      |       | 0.75  | 16    | 45.5  | 35    | 10   | 4.5   | 2.25  | 1.25  | 1.25  | 0.25 | 0.75 |
| 09b              |      |       |       |       | 7     | 41.5  | 77   | 86.25 | 88.75 | 89.25 | 89.75 | 91   | 91   |

Note: values below 1% were excluded the regular development pattern; blue <5%, green 5–50%, red >50%

Table S3. Hydropriming as seed priming method and germination percentages in each secondary stages every day for basil

| Secondary Stages | Days  |       |       |       |       |       |       |       |       |       |    |      |      |
|------------------|-------|-------|-------|-------|-------|-------|-------|-------|-------|-------|----|------|------|
|                  | 1     | 2     | 3     | 4     | 5     | 6     | 7     | 8     | 9     | 10    | 11 | 12   | 13   |
| 00               | 10.75 | 10.25 | 10.25 | 10.25 | 10.25 | 9.75  | 9.5   | 8     | 8     | 8     | 8  | 7.25 | 7.25 |
| 01               | 15.5  | 7.75  | 2.25  |       |       |       |       |       |       |       |    |      |      |
| 03               | 55.5  | 25.5  | 8.25  | 2.75  |       |       |       |       |       |       |    |      |      |
| 05               | 13    | 21    | 4.75  | 3.75  | 0.75  | 0.5   | 0.25  | 0.75  |       |       |    |      |      |
| 06a              | 4     | 15    | 8.75  | 3     | 2.5   | 1.25  | 1     | 1.5   |       |       |    | 0.5  |      |
| 06b              | 1.25  | 11    | 12.5  | 1.5   | 1.75  | 2     | 1     | 0.75  | 0.75  |       |    | 0.25 | 0.5  |
| 06c              |       | 8.25  | 6.5   | 3.25  | 1     | 0.25  |       |       | 0.25  |       |    |      |      |
| 07               |       | 1     | 18.75 | 23.25 | 0.25  |       | 0.5   | 0.25  |       | 0.75  |    |      | 0.25 |
| 08               |       |       | 24.25 | 22    | 16.25 | 9     | 5     | 3     | 2.5   | 1     |    |      |      |
| 09a              |       | 0.25  | 3.75  | 30.25 | 61.75 | 54.25 | 15.5  | 6     | 5.75  | 5.5   |    |      |      |
| 09b              |       |       |       |       | 5.5   | 23    | 67.25 | 79.75 | 82.75 | 84.75 | 92 | 92   | 92   |

Note: values below 1% were excluded the regular development pattern; blue <5%, green 5–50%, red >50%

Table S4. Control treatment and germination percentages in each secondary stages every day for basil

| Secondary Stages | Days |    |      |      |      |      |     |     |     |      |     |     |      |
|------------------|------|----|------|------|------|------|-----|-----|-----|------|-----|-----|------|
|                  | 1    | 2  | 3    | 4    | 5    | 6    | 7   | 8   | 9   | 10   | 11  | 12  | 13   |
| 00               | 11.5 | 11 | 10.5 | 10.5 | 10.5 | 10.5 | 9.5 | 9.5 | 9.5 | 9.5  | 9.5 | 9.5 | 9.5  |
| 01               | 43.5 | 5  |      |      |      |      |     |     |     |      |     |     |      |
| 03               | 41   | 27 | 4.5  | 2    | 0.5  |      |     |     |     |      |     |     |      |
| 05               | 4    | 30 | 2    | 2    | 0.5  |      |     |     |     |      |     |     |      |
| 06a              |      | 14 | 10   |      | 1    | 0.5  |     |     |     |      |     |     |      |
| 06b              |      | 13 | 9.5  | 1    | 1.5  |      | 1   | 1   |     |      |     |     |      |
| 06c              |      |    | 12   | 2    |      |      |     |     |     |      |     |     |      |
| 07               |      |    | 38   | 9.5  | 1.5  | 0.5  |     |     |     |      |     |     |      |
| 08               |      |    | 13.5 | 61   | 23   | 10   | 5   | 3   | 2.5 | 1    |     |     |      |
| 09a              |      |    |      | 12   | 61.5 | 44.5 | 9.5 | 3.5 | 2   | 3    | 2.5 | 1.5 |      |
| 09b              |      |    |      |      |      | 34   | 75  | 83  | 86  | 86.5 | 88  | 89  | 90.5 |

Note: values below 1% were excluded the regular development pattern; blue <5%, green 5–50%, red >50%

Table S5. Differences induced by tretment methods on seed germination parameters

| Treatment | GC                      | GE                      | T25                     | T50                    | T75                    | T90                     |
|-----------|-------------------------|-------------------------|-------------------------|------------------------|------------------------|-------------------------|
| C         | 90.5±1.70 <sup>a</sup>  | 89.90±1.26 <sup>a</sup> | 3.28±0.01 <sup>b</sup>  | 6.54±0.02 <sup>a</sup> | 9.77±0.01 <sup>a</sup> | 11.70±0.00 <sup>a</sup> |
| E         | 93.5±0.95 <sup>a</sup>  | 91.50±0.29 <sup>a</sup> | 3.35±0.03 <sup>a</sup>  | 6.61±0.03 <sup>a</sup> | 9.81±0.02 <sup>a</sup> | 11.72±0.00 <sup>a</sup> |
| H         | 92.75±0.25 <sup>a</sup> | 90.25±0.25 <sup>a</sup> | 3.29±0.00 <sup>ab</sup> | 6.58±0.01 <sup>a</sup> | 9.80±0.00 <sup>a</sup> | 11.72±0.00 <sup>a</sup> |
| M         | 92.25±1.54 <sup>a</sup> | 91.75±1.31 <sup>a</sup> | 3.33±0.02 <sup>ab</sup> | 6.58±0.02 <sup>a</sup> | 9.79±0.01 <sup>a</sup> | 11.71±0.00 <sup>a</sup> |

Note: Means±s.e. followed by different letters present significant differences at  $p < 0.05$  according to LSD test. Legend: GC – germination capacity (%); GE – germination energy (%); T25, T50, T75 and T90 – time to 25%, 50%, 75% and 90% seed germination (days).
